# Supplementary material for: Colletotrichum Species Associated with Anthracnose Disease of Watermelon (Citrullus lanatus) in China
Source: MDPI journal article supplement (doi:10.3390/jof8080790), 2022-07-28
Supplement: s1 [file s1]

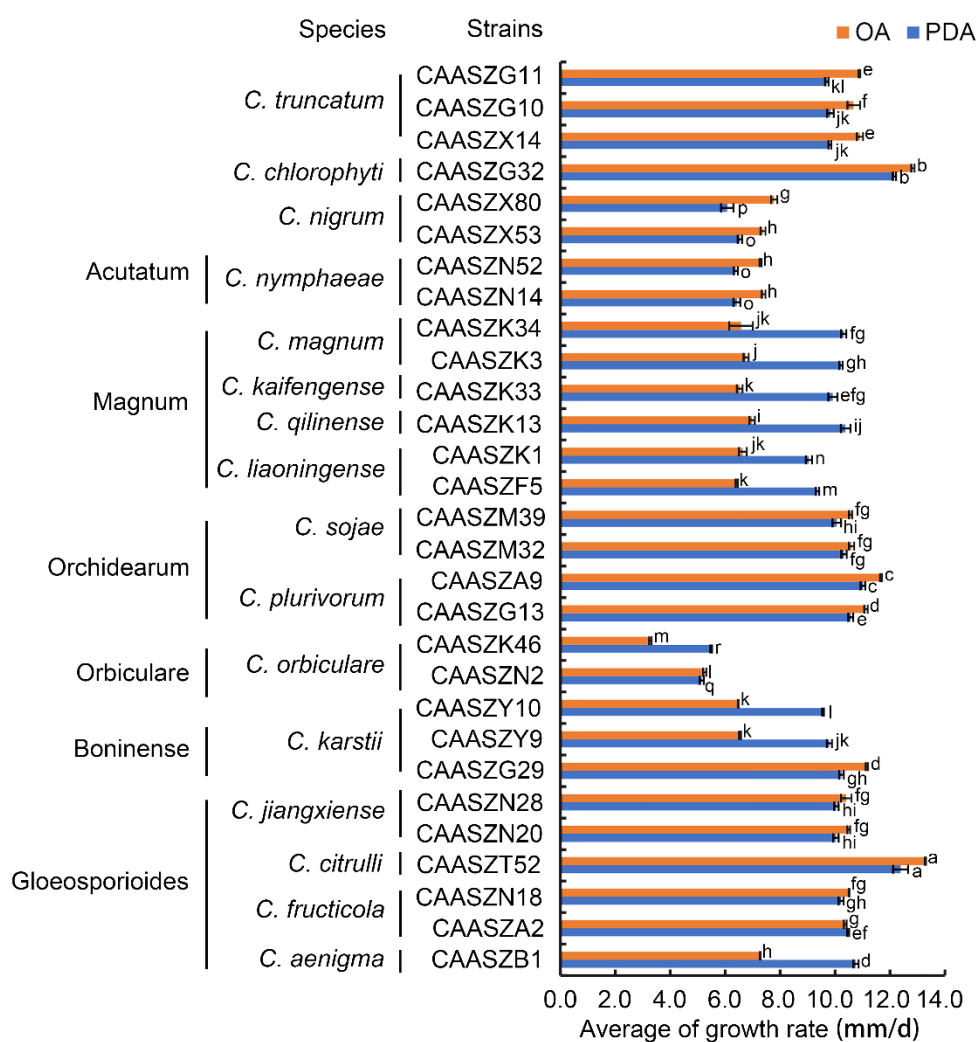

**Figure S1.** The growth rate of the representative isolates of *Colletotrichum* spp. obtained in this study. Data were analysed with SPSS Statistics 19.0 (WinWrap Basic; <http://www.winwrap.com>) by one-way analysis of variance, and means were compared using Duncan's test at a significance level of  $P = 0.05$ . Letters over the error bars indicate the significant difference at the  $P = 0.05$  level.
