# Supplementary material for: Colletotrichum Species Associated with Anthracnose Disease of Watermelon (Citrullus lanatus) in China
Source: MDPI journal article supplement (doi:10.3390/jof8080790), 2022-07-28
Supplement: s1 [file s1]

**Table S1.** List of 148 representative isolates of 15 *Colletotrichum* spp. collected from watermelon in China, with details host and location, and Genbank No.

| Species               | Isolate No       | Host                                   | Location               | GenBank No      |                 |                 |                 |                 |                 |           |
|-----------------------|------------------|----------------------------------------|------------------------|-----------------|-----------------|-----------------|-----------------|-----------------|-----------------|-----------|
|                       |                  |                                        |                        | ITS             | <i>gadph</i>    | <i>chs-1</i>    | <i>his3</i>     | <i>act</i>      | <i>tub2</i>     | <i>gs</i> |
| <i>C. aenigma</i>     | CAASZB1          | <i>Citrullus lanatus</i> , leaf        | Ningbo, Zhejiang       | MZ475286        | OL898946        | OL986036        | ON479073        | OL986216        | OL988221        | —         |
|                       | CAASZB7          | <i>Citrullus lanatus</i> , leaf        | Ningbo, Zhejiang       | MZ475287        | OL898947        | OL986037        | ON479074        | OL986217        | OL988222        | —         |
|                       | CAASZB13         | <i>Citrullus lanatus</i> , leaf        | Ningbo, Zhejiang       | MZ475288        | OL898948        | OL986038        | ON479075        | OL986218        | OL988223        | —         |
| <i>C. chlorophyti</i> | CAASZG32         | <i>Citrullus lanatus</i> , stem        | Ganzhou, Jiangxi       | MZ475145        | OL899024        | OL986114        | —               | OL986294        | OL988299        | —         |
|                       | CAASZG33         | <i>Citrullus lanatus</i> , stem        | Ganzhou, Jiangxi       | MZ475146        | OL899025        | OL986115        | —               | OL986295        | OL988300        | —         |
| <i>C. citrulli</i>    | <b>CAASZT52*</b> | <b><i>Citrullus lanatus</i>, fruit</b> | <b>Taikang, Hennan</b> | <b>MZ475133</b> | <b>OL456685</b> | <b>OL901153</b> | <b>ON479082</b> | <b>OL449283</b> | <b>OL456644</b> | —         |
|                       | CAASZT54         | <i>Citrullus lanatus</i> , fruit       | Taikang, Hennan        | MZ475134        | OL456686        | OL901154        | ON479083        | OL449284        | OL456645        | —         |
| <i>C. fructicola</i>  | CAASZA2          | <i>Citrullus lanatus</i> , leaf        | Gaoan, Jiangxi         | MZ475198        | OL898940        | OL986030        | ON479077        | OL986210        | OL988215        | —         |
|                       | CAASZN11         | <i>Citrullus lanatus</i> , stem        | Enshi, Hubei           | MZ475153        | OL898941        | OL986031        | ON479080        | OL986211        | OL988216        | —         |
|                       | CAASZN18         | <i>Citrullus lanatus</i> , stem        | Enshi, Hubei           | MZ475155        | OL898942        | OL986032        | ON479079        | OL986212        | OL988217        | —         |
|                       | CAASZN21         | <i>Citrullus lanatus</i> , stem        | Enshi, Hubei           | MZ475157        | OL898943        | OL986033        | ON479078        | OL986213        | OL988218        | —         |
|                       | CAASZN33         | <i>Citrullus lanatus</i> , leaf        | Enshi, Hubei           | MZ475159        | OL898944        | OL986034        | ON479076        | OL986214        | OL988219        | —         |
|                       | CAASZN5          | <i>Citrullus lanatus</i> , stem        | Enshi, Hubei           | MZ475152        | OL898945        | OL986035        | ON479081        | OL986215        | OL988220        | —         |
|                       | CAASZN4          | <i>Citrullus lanatus</i> , stem        | Enshi, Hubei           | MZ475151        | OL898949        | OL986039        | ON479084        | OL986219        | OL988224        | —         |
| <i>C. jiangxiense</i> | CAASZN28         | <i>Citrullus lanatus</i> , leaf        | Enshi, Hubei           | MZ475158        | OL898950        | OL986040        | ON479085        | OL986220        | OL988225        | —         |
|                       | CAASZK10         | <i>Citrullus lanatus</i> , fruit       | Weishi, Henan          | MZ475214        | OL456709        | OL901177        | OM057718        | OL449307        | OL456668        | —         |
| <i>C. kaifengense</i> | CAASZK27         | <i>Citrullus lanatus</i> , fruit       | Jinming, Henan         | MZ475239        | OL456710        | OL901178        | OM057719        | OL449308        | OL456669        | —         |
|                       | CAASZK28         | <i>Citrullus lanatus</i> , fruit       | Jinming, Henan         | MZ475240        | OL456711        | OL901179        | OM057720        | OL449309        | OL456670        | —         |
|                       | CAASZK29         | <i>Citrullus lanatus</i> , fruit       | Jinming, Henan         | MZ475241        | OL456712        | OL901180        | OM057721        | OL449310        | OL456671        | —         |
|                       | CAASZK32         | <i>Citrullus lanatus</i> , fruit       | Jinming, Henan         | MZ475244        | OL456714        | OL901182        | OM057723        | OL449312        | OL456673        | —         |
|                       | <b>CAASZK33*</b> | <b><i>Citrullus lanatus</i>, fruit</b> | <b>Jinming, Henan</b>  | <b>MZ475245</b> | <b>OL456715</b> | <b>OL901183</b> | <b>OM057724</b> | <b>OL449313</b> | <b>OL456674</b> | —         |
|                       | CAASZG29         | <i>Citrullus lanatus</i> , stem        | Ganzhou, Jiangxi       | MZ475144        | OL898951        | OL986041        | OL986137        | OL986221        | OL988226        | —         |
| <i>C. karstii</i>     | CAASZG43         | <i>Citrullus lanatus</i> , leaf        | Ganzhou, Jiangxi       | MZ475148        | OL898952        | OL986042        | OL986138        | OL986222        | OL988227        | —         |
|                       | CAASZG46         | <i>Citrullus lanatus</i> , leaf        | Ganzhou, Jiangxi       | MZ475149        | OL898953        | OL986043        | OL986139        | OL986223        | OL988228        | —         |
|                       | CAASZY1          | <i>Citrullus lanatus</i> , leaf        | Jiyang, Hainan         | MZ475254        | OL898954        | OL986044        | OL986140        | OL986224        | OL988229        | —         |
|                       | CAASZY10         | <i>Citrullus lanatus</i> , leaf        | Jiyang, Hainan         | MZ475263        | OL898955        | OL986045        | OL986141        | OL986225        | OL988230        | —         |

Table S1. (cont.)

| Species          | Isolate No | Host                             | Location       | GenBank No |              |            |             |            |             |           |
|------------------|------------|----------------------------------|----------------|------------|--------------|------------|-------------|------------|-------------|-----------|
|                  |            |                                  |                | ITS        | <i>gadph</i> | <i>his</i> | <i>his3</i> | <i>act</i> | <i>tub2</i> | <i>gs</i> |
| <i>C. magnum</i> | CAASZY11   | <i>Citrullus lanatus</i> , leaf  | Jiyang, Hainan | MZ475264   | OL898956     | OL986046   | OL986142    | OL986226   | OL988231    | —         |
|                  | CAASZY12   | <i>Citrullus lanatus</i> , leaf  | Jiyang, Hainan | MZ475265   | OL898957     | OL986047   | OL986143    | OL986227   | OL988232    | —         |
|                  | CAASZY13   | <i>Citrullus lanatus</i> , leaf  | Jiyang, Hainan | MZ475266   | OL898958     | OL986048   | OL986144    | OL986228   | OL988233    | —         |
|                  | CAASZY14   | <i>Citrullus lanatus</i> , leaf  | Jiyang, Hainan | MZ475267   | OL898959     | OL986049   | OL986145    | OL986229   | OL988234    | —         |
|                  | CAASZY15   | <i>Citrullus lanatus</i> , leaf  | Jiyang, Hainan | MZ475268   | OL898960     | OL986050   | OL986146    | OL986230   | OL988235    | —         |
|                  | CAASZY16   | <i>Citrullus lanatus</i> , leaf  | Jiyang, Hainan | MZ475269   | OL898961     | OL986051   | OL986147    | OL986231   | OL988236    | —         |
|                  | CAASZY17   | <i>Citrullus lanatus</i> , leaf  | Jiyang, Hainan | MZ475270   | OL898962     | OL986052   | OL986148    | OL986232   | OL988237    | —         |
|                  | CAASZY18   | <i>Citrullus lanatus</i> , leaf  | Jiyang, Hainan | MZ475271   | OL898963     | OL986053   | OL986149    | OL986233   | OL988238    | —         |
|                  | CAASZY19   | <i>Citrullus lanatus</i> , leaf  | Jiyang, Hainan | MZ475272   | OL898964     | OL986054   | OL986150    | OL986234   | OL988239    | —         |
|                  | CAASZY2    | <i>Citrullus lanatus</i> , leaf  | Jiyang, Hainan | MZ475255   | OL898965     | OL986055   | OL986151    | OL986235   | OL988240    | —         |
|                  | CAASZY20   | <i>Citrullus lanatus</i> , leaf  | Jiyang, Hainan | MZ475273   | OL898966     | OL986056   | OL986152    | OL986236   | OL988241    | —         |
|                  | CAASZY3    | <i>Citrullus lanatus</i> , leaf  | Jiyang, Hainan | MZ475256   | OL898967     | OL986057   | OL986153    | OL986237   | OL988242    | —         |
|                  | CAASZY4    | <i>Citrullus lanatus</i> , leaf  | Jiyang, Hainan | MZ475257   | OL898968     | OL986058   | OL986154    | OL986238   | OL988243    | —         |
|                  | CAASZY5    | <i>Citrullus lanatus</i> , leaf  | Jiyang, Hainan | MZ475258   | OL898969     | OL986059   | OL986155    | OL986239   | OL988244    | —         |
|                  | CAASZY6    | <i>Citrullus lanatus</i> , leaf  | Jiyang, Hainan | MZ475259   | OL898970     | OL986060   | OL986156    | OL986240   | OL988245    | —         |
|                  | CAASZY7    | <i>Citrullus lanatus</i> , leaf  | Jiyang, Hainan | MZ475260   | OL898971     | OL986061   | OL986157    | OL986241   | OL988246    | —         |
|                  | CAASZY8    | <i>Citrullus lanatus</i> , leaf  | Jiyang, Hainan | MZ475261   | OL898972     | OL986062   | OL986158    | OL986242   | OL988247    | —         |
|                  | CAASZY9    | <i>Citrullus lanatus</i> , leaf  | Jiyang, Hainan | MZ475262   | OL898973     | OL986063   | OL986159    | OL986243   | OL988248    | —         |
|                  | CAASZK4    | <i>Citrullus lanatus</i> , fruit | Tongxu, Henan  | MZ475208   | OL899045     | OL901141   | OM057684    | OL986315   | OL988320    | —         |
|                  | CAASZF5    | <i>Citrullus lanatus</i> , fruit | Fugou, Henan   | MZ475164   | OL456675     | OL901143   | OM057686    | OL449273   | OL456634    | —         |
|                  | CAASZF9    | <i>Citrullus lanatus</i> , fruit | Fugou, Henan   | MZ475165   | OL456676     | OL901144   | OM057687    | OL449274   | OL456635    | —         |
|                  | CAASZF13   | <i>Citrullus lanatus</i> , fruit | Fugou, Henan   | MZ475166   | OL456677     | OL901145   | OM057688    | OL449275   | OL456636    | —         |
|                  | CAASZK1    | <i>Citrullus lanatus</i> , fruit | Tongxu, Henan  | MZ475205   | OL456678     | OL901146   | OM057689    | OL449276   | OL456637    | —         |
|                  | CAASZK2    | <i>Citrullus lanatus</i> , fruit | Tongxu, Henan  | MZ475206   | OL456679     | OL901147   | OM057690    | OL449277   | OL456638    | —         |
|                  | CAASZK5    | <i>Citrullus lanatus</i> , fruit | Tongxu, Henan  | MZ475209   | OL456680     | OL901148   | OM057691    | OL449278   | OL456639    | —         |
|                  | CAASZK6    | <i>Citrullus lanatus</i> , fruit | Tongxu, Henan  | MZ475210   | OL456681     | OL901149   | OM057692    | OL449279   | OL456640    | —         |

Table S1. (cont.)

| Species              | Isolate No | Host                             | Location            | GenBank No |              |              |             |            |             |           |
|----------------------|------------|----------------------------------|---------------------|------------|--------------|--------------|-------------|------------|-------------|-----------|
|                      |            |                                  |                     | ITS        | <i>gadph</i> | <i>chs-1</i> | <i>his3</i> | <i>act</i> | <i>tub2</i> | <i>gs</i> |
| <i>C. nigrum</i>     | CAASZK7    | <i>Citrullus lanatus</i> , fruit | Tongxu, Henan       | MZ475211   | OL456682     | OL901150     | OM057693    | OL449280   | OL456641    | —         |
|                      | CAASZK8    | <i>Citrullus lanatus</i> , fruit | Tongxu, Henan       | MZ475212   | OL456683     | OL901151     | OM057694    | OL449281   | OL456642    | —         |
|                      | CAASZK9    | <i>Citrullus lanatus</i> , fruit | Weishi, Henan       | MZ475213   | OL899046     | OL901142     | OM057685    | OL986316   | OL988321    | —         |
|                      | CAASZK3    | <i>Citrullus lanatus</i> , fruit | Tongxu, Henan       | MZ475207   | OL899043     | OL986133     | OL986208    | OL986313   | OL988318    | —         |
|                      | CAASZK34   | <i>Citrullus lanatus</i> , fruit | Jinming, Henan      | MZ475246   | OL899044     | OL986134     | OL986209    | OL986314   | OL988319    | —         |
|                      | CAASZX19   | <i>Citrullus lanatus</i> , stem  | Xinxiang, Henan     | MZ475182   | OL899026     | OL986116     | —           | OL986296   | OL988301    | —         |
|                      | CAASZX53   | <i>Citrullus lanatus</i> , stem  | Xinxiang, Henan     | MZ475187   | OL899027     | OL986117     | —           | OL986297   | OL988302    | —         |
|                      | CAASZX80   | <i>Citrullus lanatus</i> , leaf  | Xinxiang, Henan     | MZ475191   | OL899028     | OL986118     | —           | OL986298   | OL988303    | —         |
| <i>C. nymphaeae</i>  | CAASZN14   | <i>Citrullus lanatus</i> , leaf  | Enshi, Hubei        | MZ475154   | OL899022     | OL986112     | —           | OL986292   | OL988297    | —         |
|                      | CAASZN52   | <i>Citrullus lanatus</i> , leaf  | Enshi, Hubei        | MZ475161   | OL899023     | OL986113     | —           | OL986293   | OL988298    | —         |
| <i>C. orbiculare</i> | CAASZC13   | <i>Citrullus lanatus</i> , leaf  | Tongyu, Jilin       | MZ475136   | OL898974     | OL986064     | OL986160    | OL986244   | OL988249    | OM057725  |
|                      | CAASZC19   | <i>Citrullus lanatus</i> , leaf  | Tongyu, Jilin       | MZ475137   | OL898975     | OL986065     | OL986161    | OL986245   | OL988250    | OM057726  |
|                      | CAASZC7    | <i>Citrullus lanatus</i> , stem  | Tongyu, Jilin       | MZ475135   | OL898976     | OL986066     | OL986162    | OL986246   | OL988251    | OM057727  |
|                      | CAASZD1    | <i>Citrullus lanatus</i> , stem  | Fengcheng, Liaoning | MZ475279   | OL898977     | OL986067     | OL986163    | OL986247   | OL988252    | OM057728  |
|                      | CAASZD13   | <i>Citrullus lanatus</i> , leaf  | Fengcheng, Liaoning | MZ475281   | OL898978     | OL986068     | OL986164    | OL986248   | OL988253    | OM057729  |
|                      | CAASZD19   | <i>Citrullus lanatus</i> , leaf  | Fengcheng, Liaoning | MZ475282   | OL898979     | OL986069     | OL986165    | OL986249   | OL988254    | OM057730  |
|                      | CAASZD7    | <i>Citrullus lanatus</i> , stem  | Fengcheng, Liaoning | MZ475280   | OL898980     | OL986070     | OL986166    | OL986250   | OL988255    | OM057731  |
|                      | CAASZF27   | <i>Citrullus lanatus</i> , fruit | Fugou, Henan        | MZ475169   | OL898981     | OL986071     | OL986167    | OL986251   | OL988256    | OM057732  |
|                      | CAASZF3    | <i>Citrullus lanatus</i> , fruit | Fugou, Henan        | MZ475162   | OL898982     | OL986072     | OL986168    | OL986252   | OL988257    | —         |
|                      | CAASZF4    | <i>Citrullus lanatus</i> , fruit | Fugou, Henan        | MZ475163   | OL898983     | OL986073     | OL986169    | OL986253   | OL988258    | OM057733  |
|                      | CAASZJ1    | <i>Citrullus lanatus</i> , fruit | Yancheng, Jiangsu   | MZ475170   | OL898984     | OL986074     | OL986170    | OL986254   | OL988259    | OM057734  |
|                      | CAASZJ2    | <i>Citrullus lanatus</i> , fruit | Yancheng, Jiangsu   | MZ475171   | OL898985     | OL986075     | OL986171    | OL986255   | OL988260    | OM057735  |
|                      | CAASZJ20   | <i>Citrullus lanatus</i> , fruit | Yancheng, Jiangsu   | MZ475173   | OL898986     | OL986076     | OL986172    | OL986256   | OL988261    | OM057736  |
|                      | CAASZJ8    | <i>Citrullus lanatus</i> , fruit | Yancheng, Jiangsu   | MZ475172   | OL898987     | OL986077     | OL986173    | OL986257   | OL988262    | OM057737  |
|                      | CAASZK42   | <i>Citrullus lanatus</i> , fruit | Xiangfu, Henan      | MZ475227   | OL898988     | OL986078     | OL986174    | OL986258   | OL988263    | OM057738  |
|                      | CAASZK43   | <i>Citrullus lanatus</i> , fruit | Xiangfu, Henan      | MZ475228   | OL898989     | OL986079     | OL986175    | OL986259   | OL988264    | OM057739  |

Table S1. (cont.)

| Species              | Isolate No | Host                             | Location         | GenBank No |              |              |             |            |             |           |
|----------------------|------------|----------------------------------|------------------|------------|--------------|--------------|-------------|------------|-------------|-----------|
|                      |            |                                  |                  | ITS        | <i>gadph</i> | <i>chs-1</i> | <i>his3</i> | <i>act</i> | <i>tub2</i> | <i>gs</i> |
| <i>C. plurivorum</i> | CAASZK44   | <i>Citrullus lanatus</i> , fruit | Xiangfu, Henan   | MZ475229   | OL898990     | OL986080     | OL986176    | OL986260   | OL988265    | OM057740  |
|                      | CAASZK45   | <i>Citrullus lanatus</i> , fruit | Xiangfu, Henan   | MZ475230   | OL898991     | OL986081     | OL986177    | OL986261   | OL988266    | OM057741  |
|                      | CAASZK46   | <i>Citrullus lanatus</i> , fruit | Xiangfu, Henan   | MZ475231   | OL898992     | OL986082     | OL986178    | OL986262   | OL988267    | OM057742  |
|                      | CAASZK47   | <i>Citrullus lanatus</i> , fruit | Xiangfu, Henan   | MZ475232   | OL898993     | OL986083     | OL986179    | OL986263   | OL988268    | OM057743  |
|                      | CAASZK48   | <i>Citrullus lanatus</i> , fruit | Xiangfu, Henan   | MZ475233   | OL898994     | OL986084     | OL986180    | OL986264   | OL988269    | OM057744  |
|                      | CAASZK54   | <i>Citrullus lanatus</i> , fruit | Xiangfu, Henan   | MZ475174   | OL898995     | OL986085     | OL986181    | OL986265   | OL988270    | —         |
|                      | CAASZK55   | <i>Citrullus lanatus</i> , fruit | Xiangfu, Henan   | MZ475175   | OL898996     | OL986086     | OL986182    | OL986266   | OL988271    | OM057745  |
|                      | CAASZK67   | <i>Citrullus lanatus</i> , fruit | Xiangfu, Henan   | MZ475176   | OL898997     | OL986087     | OL986183    | OL986267   | OL988272    | —         |
|                      | CAASZM1    | <i>Citrullus lanatus</i> , leaf  | Zhongmou, Henan  | MZ475274   | OL898998     | OL986088     | OL986184    | OL986268   | OL988273    | —         |
|                      | CAASZM19   | <i>Citrullus lanatus</i> , leaf  | Zhongmou, Henan  | MZ475277   | OL898999     | OL986089     | OL986185    | OL986269   | OL988274    | —         |
|                      | CAASZN2    | <i>Citrullus lanatus</i> , stem  | Enshi, Hubei     | MZ475150   | OL899000     | OL986090     | OL986186    | OL986270   | OL988275    | OM057746  |
|                      | CAASZN20   | <i>Citrullus lanatus</i> , stem  | Enshi, Hubei     | MZ475156   | OL899001     | OL986091     | OL986187    | OL986271   | OL988276    | —         |
|                      | CAASZN46   | <i>Citrullus lanatus</i> , leaf  | Enshi, Hubei     | MZ475160   | OL899002     | OL986092     | OL986188    | OL986272   | OL988277    | OM057747  |
|                      | CAASZT40   | <i>Citrullus lanatus</i> , fruit | Taikang, Hennan  | MZ475129   | OL899003     | OL986093     | OL986189    | OL986273   | OL988278    | OM057748  |
|                      | CAASZT46   | <i>Citrullus lanatus</i> , fruit | Taikang, Hennan  | MZ475131   | OL899004     | OL986094     | OL986190    | OL986274   | OL988279    | OM057749  |
|                      | CAASZX1    | <i>Citrullus lanatus</i> , fruit | Xinxiang, Henan  | MZ475177   | OL899005     | OL986095     | OL986191    | OL986275   | OL988280    | —         |
|                      | CAASZX3    | <i>Citrullus lanatus</i> , fruit | Xinxiang, Henan  | MZ475178   | OL899006     | OL986096     | OL986192    | OL986276   | OL988281    | OM057750  |
|                      | CAASZX5    | <i>Citrullus lanatus</i> , fruit | Gaoan, Jiangxi   | MZ475179   | OL899007     | OL986097     | OL986193    | OL986277   | OL988282    | OM057751  |
|                      | CAASZA10   | <i>Citrullus lanatus</i> , leaf  | Gaoan, Jiangxi   | MZ475200   | OL899008     | OL986098     | OL986194    | OL986278   | OL988283    | —         |
|                      | CAASZA14   | <i>Citrullus lanatus</i> , leaf  | Gaoan, Jiangxi   | MZ475201   | OL899009     | OL986099     | OL986195    | OL986279   | OL988284    | —         |
|                      | CAASZA15   | <i>Citrullus lanatus</i> , leaf  | Gaoan, Jiangxi   | MZ475202   | OL899010     | OL986100     | OL986196    | OL986280   | OL988285    | —         |
|                      | CAASZA20   | <i>Citrullus lanatus</i> , leaf  | Gaoan, Jiangxi   | MZ475203   | OL899011     | OL986101     | OL986197    | OL986281   | OL988286    | —         |
|                      | CAASZA30   | <i>Citrullus lanatus</i> , leaf  | Gaoan, Jiangxi   | MZ475204   | OL899012     | OL986102     | OL986198    | OL986282   | OL988287    | —         |
|                      | CAASZA9    | <i>Citrullus lanatus</i> , leaf  | Gaoan, Jiangxi   | MZ475199   | OL899013     | OL986103     | OL986199    | OL986283   | OL988288    | —         |
|                      | CAASZG13   | <i>Citrullus lanatus</i> , stem  | Ganzhou, Jiangxi | MZ475142   | OL899014     | OL986104     | OL986200    | OL986284   | OL988289    | —         |
|                      | CAASZG2    | <i>Citrullus lanatus</i> , stem  | Ganzhou, Jiangxi | MZ475138   | OL899015     | OL986105     | OL986201    | OL986285   | OL988290    | —         |

Table S1. (cont.)

| Species             | Isolate No       | Host                                   | Location             | GenBank No      |                 |                 |                 |                 |                 |           |
|---------------------|------------------|----------------------------------------|----------------------|-----------------|-----------------|-----------------|-----------------|-----------------|-----------------|-----------|
|                     |                  |                                        |                      | ITS             | <i>gadph</i>    | <i>chs-1</i>    | <i>his3</i>     | <i>act</i>      | <i>tub2</i>     | <i>gs</i> |
| <i>C. qilinense</i> | CAASZG5          | <i>Citrullus lanatus</i> , stem        | Ganzhou, Jiangxi     | MZ475139        | OL899016        | OL986106        | OL986202        | OL986286        | OL988291        | —         |
|                     | CAASZT1          | <i>Citrullus lanatus</i> , fruit       | Taikang, Hennan      | MZ475124        | OL456687        | OL901155        | OM057696        | OL449285        | OL456646        | —         |
|                     | CAASZT3          | <i>Citrullus lanatus</i> , fruit       | Taikang, Hennan      | MZ475125        | OL456688        | OL901156        | OM057697        | OL449286        | OL456647        | —         |
|                     | CAASZT5          | <i>Citrullus lanatus</i> , fruit       | Taikang, Hennan      | MZ475126        | OL456689        | OL901157        | OM057698        | OL449287        | OL456648        | —         |
|                     | CAASZT45         | <i>Citrullus lanatus</i> , fruit       | Taikang, Hennan      | MZ475130        | OL456690        | OL901158        | OM057699        | OL449288        | OL456649        | —         |
|                     | CAASZT47         | <i>Citrullus lanatus</i> , fruit       | Taikang, Hennan      | MZ475132        | OL456691        | OL901159        | OM057700        | OL449289        | OL456650        | —         |
|                     | CAASZK11         | <i>Citrullus lanatus</i> , fruit       | Weishi, Henan        | MZ475215        | OL456692        | OL901160        | OM057701        | OL449290        | OL456651        | —         |
|                     | CAASZK12         | <i>Citrullus lanatus</i> , fruit       | Weishi, Henan        | MZ475216        | OL456693        | OL901161        | OM057702        | OL449291        | OL456652        | —         |
|                     | <b>CAASZK13*</b> | <b><i>Citrullus lanatus</i>, fruit</b> | <b>Weishi, Henan</b> | <b>MZ475217</b> | <b>OL456694</b> | <b>OL901162</b> | <b>OM057703</b> | <b>OL449292</b> | <b>OL456653</b> | —         |
|                     | CAASZK14         | <i>Citrullus lanatus</i> , fruit       | Weishi, Henan        | MZ475218        | OL456695        | OL901163        | OM057704        | OL449293        | OL456654        | —         |
|                     | CAASZK15         | <i>Citrullus lanatus</i> , fruit       | Weishi, Henan        | MZ475219        | OL456696        | OL901164        | OM057705        | OL449294        | OL456655        | —         |
|                     | CAASZK16         | <i>Citrullus lanatus</i> , fruit       | Weishi, Henan        | MZ475220        | OL456697        | OL901165        | OM057706        | OL449295        | OL456656        | —         |
|                     | CAASZK23         | <i>Citrullus lanatus</i> , fruit       | Jinming, Henan       | MZ475235        | OL456698        | OL901166        | OM057707        | OL449296        | OL456657        | —         |
|                     | CAASZK24         | <i>Citrullus lanatus</i> , fruit       | Jinming, Henan       | MZ475236        | OL456699        | OL901167        | OM057708        | OL449297        | OL456658        | —         |
|                     | CAASZK25         | <i>Citrullus lanatus</i> , fruit       | Jinming, Henan       | MZ475237        | OL456700        | OL901168        | OM057709        | OL449298        | OL456659        | —         |
|                     | CAASZK26         | <i>Citrullus lanatus</i> , fruit       | Jinming, Henan       | MZ475238        | OL456701        | OL901169        | OM057710        | OL449299        | OL456660        | —         |
|                     | CAASZK30         | <i>Citrullus lanatus</i> , fruit       | Jinming, Henan       | MZ475242        | OL456702        | OL901170        | OM057711        | OL449300        | OL456661        | —         |
|                     | CAASZK37         | <i>Citrullus lanatus</i> , fruit       | Jinming, Henan       | MZ475249        | OL456703        | OL901171        | OM057712        | OL449301        | OL456662        | —         |
|                     | CAASZM7          | <i>Citrullus lanatus</i> , leaf        | Zhongmou, Henan      | MZ475275        | OL456704        | OL901172        | OM057713        | OL449302        | OL456663        | —         |
|                     | CAASZM13         | <i>Citrullus lanatus</i> , leaf        | Zhongmou, Henan      | MZ475276        | OL456705        | OL901173        | OM057714        | OL449303        | OL456664        | —         |
|                     | CAASZZ1          | <i>Citrullus lanatus</i> , fruit       | Xinzheng, Henan      | MZ475283        | OL456706        | OL901174        | OM057715        | OL449304        | OL456665        | —         |
|                     | CAASZZ7          | <i>Citrullus lanatus</i> , fruit       | Xinzheng, Henan      | MZ475284        | OL456707        | OL901175        | OM057716        | OL449305        | OL456666        | —         |
|                     | CAASZZ13         | <i>Citrullus lanatus</i> , fruit       | Xinzheng, Henan      | MZ475285        | OL456708        | OL901176        | OM057717        | OL449306        | OL456667        | —         |
| <i>C. sojiae</i>    | CAASZM31         | <i>Citrullus lanatus</i> , leaf        | Zhongmou, Henan      | MZ475193        | OL899017        | OL986107        | OL986203        | OL986287        | OL988292        | —         |
|                     | CAASZM32         | <i>Citrullus lanatus</i> , leaf        | Zhongmou, Henan      | MZ475194        | OL899018        | OL986108        | OL986204        | OL986288        | OL988293        | —         |
|                     | CAASZM37         | <i>Citrullus lanatus</i> , leaf        | Zhongmou, Henan      | MZ475195        | OL899019        | OL986109        | OL986205        | OL986289        | OL988294        | —         |

Table S1. (cont.)

| Species             | Isolate No | Host                            | Location         | GenBank No |              |              |             |            |             |           |
|---------------------|------------|---------------------------------|------------------|------------|--------------|--------------|-------------|------------|-------------|-----------|
|                     |            |                                 |                  | ITS        | <i>gadph</i> | <i>chs-1</i> | <i>his3</i> | <i>act</i> | <i>tub2</i> | <i>gs</i> |
| <i>C. truncatum</i> | CAASZM38   | <i>Citrullus lanatus</i> , leaf | Zhongmou, Henan  | MZ475196   | OL899020     | OL986110     | OL986206    | OL986290   | OL988295    | —         |
|                     | CAASZM39   | <i>Citrullus lanatus</i> , leaf | Zhongmou, Henan  | MZ475197   | OL899021     | OL986111     | OL986207    | OL986291   | OL988296    | —         |
|                     | CAASZG7    | <i>Citrullus lanatus</i> , leaf | Ganzhou, Jiangxi | MZ475140   | OL899029     | OL986119     | —           | OL986299   | OL988304    | —         |
|                     | CAASZG10   | <i>Citrullus lanatus</i> , leaf | Ganzhou, Jiangxi | MZ475141   | OL899030     | OL986120     | —           | OL986300   | OL988305    | —         |
|                     | CAASZG21   | <i>Citrullus lanatus</i> , stem | Ganzhou, Jiangxi | MZ475143   | OL899031     | OL986121     | —           | OL986301   | OL988306    | —         |
|                     | CAASZG41   | <i>Citrullus lanatus</i> , stem | Ganzhou, Jiangxi | MZ475147   | OL899032     | OL986122     | —           | OL986302   | OL988307    | —         |
|                     | CAASZX13   | <i>Citrullus lanatus</i> , leaf | Xinxiang, Henan  | MZ475180   | OL899033     | OL986123     | —           | OL986303   | OL988308    | —         |
|                     | CAASZX14   | <i>Citrullus lanatus</i> , leaf | Xinxiang, Henan  | MZ475181   | OL899034     | OL986124     | —           | OL986304   | OL988309    | —         |
|                     | CAASZX27   | <i>Citrullus lanatus</i> , leaf | Xinxiang, Henan  | MZ475183   | OL899035     | OL986125     | —           | OL986305   | OL988310    | —         |
|                     | CAASZX47   | <i>Citrullus lanatus</i> , leaf | Xinxiang, Henan  | OL454189   | OL899036     | OL986126     | —           | OL986306   | OL988311    | —         |
|                     | CAASZX35   | <i>Citrullus lanatus</i> , leaf | Xinxiang, Henan  | MZ475185   | OL899037     | OL986127     | —           | OL986307   | OL988312    | —         |
|                     | CAASZX45   | <i>Citrullus lanatus</i> , leaf | Xinxiang, Henan  | MZ475186   | OL899038     | OL986128     | —           | OL986308   | OL988313    | —         |
|                     | CAASZX57   | <i>Citrullus lanatus</i> , leaf | Xinxiang, Henan  | MZ475188   | OL899039     | OL986129     | —           | OL986309   | OL988314    | —         |
|                     | CAASZX58   | <i>Citrullus lanatus</i> , leaf | Xinxiang, Henan  | MZ475189   | OL899040     | OL986130     | —           | OL986310   | OL988315    | —         |
|                     | CAASZX65   | <i>Citrullus lanatus</i> , leaf | Xinxiang, Henan  | MZ475190   | OL899041     | OL986131     | —           | OL986311   | OL988316    | —         |
|                     | CAASZX88   | <i>Citrullus lanatus</i> , leaf | Xinxiang, Henan  | MZ475192   | OL899042     | OL986132     | —           | OL986312   | OL988317    | —         |

\* = ex—type or authentic culture, (\*) = ex—type or authentic culture of synonymised taxon, and all are in bold font.

<sup>2</sup> ITS: internal transcribed spacers and intervening 5.8S nrDNA; GAPDH: partial glyceraldehyde-3-phosphate dehydrogenase gene; CHS-1: partial chitin synthase-1 gene; HIS: partial histone H3 gene; ACT: partial actin gene; TUB2: partial beta-tubulin gene; GS: intron 2 glutamine synthetase.
