# Supplementary material for: Colletotrichum Species Associated with Anthracnose Disease of Watermelon (Citrullus lanatus) in China
Source: MDPI journal article supplement (doi:10.3390/jof8080790), 2022-07-28
Supplement: s1 [file s1]

**Table S3.** The sizes of seta, conidia, appresoria and ascospores of the representative isolates of *Colletotrichum* spp. obtained in this study.

| Species               | Strain number | Seta on SNA                           | Conidia on PDA                        |                                         |           | Appresoria on PDA                     |                                         |           | Ascospores on OA                      |                                         |           |
|-----------------------|---------------|---------------------------------------|---------------------------------------|-----------------------------------------|-----------|---------------------------------------|-----------------------------------------|-----------|---------------------------------------|-----------------------------------------|-----------|
|                       |               | Length (μm) × Width (μm) <sup>1</sup> | Length (μm) × Width (μm) <sup>1</sup> | Means ± SD of conidia size <sup>2</sup> | L/W ratio | Length (μm) × Width (μm) <sup>1</sup> | Means ± SD of conidia size <sup>2</sup> | L/W ratio | Length (μm) × Width (μm) <sup>1</sup> | Means ± SD of conidia size <sup>2</sup> | L/W ratio |
| <i>C. aenigma</i>     | CAASZB1       | 41.8–80.9 × 3.9–6.5                   | 13.4–18.2 × 4.4–6.3                   | 15.6 ± 1.1 × 5.5 ± 0.4                  | 2.9       | 8.4–12.7 × 6.4–10.8                   | 10.8 ± 1.1 × 8.3 ± 1.1                  | 1.3       | 14.8–18.7 × 4.8–7.4                   | 16.4 ± 0.9 × 5.8 ± 0.6                  | 2.8       |
| <i>C. chlorophyti</i> | CAASZG32      | 47.2–141.3 × 3.9–6.2                  | 15.9–20.6 × 5.4–6.4                   | 17.5 ± 1.2 × 5.2 ± 0.5                  | 3.4       | 9.2–16.1 × 5.9–12.5                   | 11.8 ± 1.6 × 8.9 ± 1.4                  | 1.3       | /                                     | /                                       | /         |
| <i>C. citrulli</i>    | CAASZT52      | 42.1–78.9 × 3.1–6.4                   | 14.8–18.3 × 4.8–6.5                   | 16.4 ± 0.9 × 5.5 ± 0.5                  | 3         | 7.4–15.1 × 5.0–10.0                   | 10.8 ± 1.7 × 7.6 ± 1.2                  | 1.4       | /                                     | /                                       | /         |
| <i>C. fructicola</i>  | CAASZA2       | 40.8–85.2 × 3.2–5.5                   | 12.0–16.8 × 3.8–7.0                   | 13.6 ± 1.1 × 4.9 ± 0.8                  | 2.8       | 7.3–13.4 × 5.3–11.4                   | 10.4 ± 1.5 × 8.0 ± 1.2                  | 1.3       | 16.6–21.5 × 4.2–6.0                   | 19.3 ± 1.7 × 4.7 ± 0.4                  | 4.2       |
|                       | CAASZN18      | /                                     | /                                     | /                                       | /         | /                                     | /                                       | /         | 16.6–22.2 × 3.8–6.1                   | 18.8 ± 1.5 × 5.0 ± 0.6                  | 3.8       |
| <i>C. jiangxiense</i> | CAASZN28      | /                                     | 14.1–22.1 × 4.2–8.2                   | 17.4 ± 2.0 × 5.2 ± 0.8                  | 3.4       | 8.0–13.3 × 6.1–10.0                   | 10.5 ± 1.2 × 7.8 ± 0.9                  | 1.4       | /                                     | /                                       | /         |
|                       | CAASZN20      | /                                     | 10.0–20.0 × 4.2–6.3                   | 13.3 ± 2.8 × 5.1 ± 0.5                  | 2.6       | 7.0–11.4 × 6.4–9.1                    | 9.2 ± 1.0 × 7.6 ± 0.8                   | 1.2       | /                                     | /                                       | /         |
| <i>C. kaifengense</i> | CAASZK33      | 82.4–177.3 × 4.4–6.9                  | 13.3–19.8 × 4.0–6.4                   | 17.4 ± 1.7 × 4.9 ± 0.5                  | 3.5       | 8.3–14.5 × 5.4–11.2                   | 11.1 ± 1.9 × 7.9 ± 1.4                  | 1.5       | /                                     | /                                       | /         |
| <i>C. karstii</i>     | CAASZG29      | 39.6–73.7 × 3.6–7.1                   | 13.3–15.9 × 5.1–6.9                   | 14.0 ± 1.9 × 6.2 ± 0.4                  | 2.3       | 9.1–14.3 × 6.6–10.8                   | 10.6 ± 1.2 × 8.7 ± 1.1                  | 1.2       | 11.5–16.6 × 5.6–7.7                   | 14.0 ± 1.9 × 6.2 ± 0.4                  | 2.3       |
|                       | CAASZY9       | /                                     | 12.5–17.5 × 4.9–7.0                   | 14.9 ± 1.3 × 5.8 ± 0.5                  | 2.6       | 7.6–13.0 × 5.9–10.4                   | 9.6 ± 1.0 × 7.8 ± 0.8                   | 1.3       | /                                     | /                                       | /         |
|                       | CAASZY10      | 33.0–66.5 × 2.9–5.6                   | 12.3–17.1 × 5.2–8.2                   | 14.7 ± 0.9 × 6.5 ± 0.7                  | 2.3       | 8.4–13.1 × 6.4–9.1                    | 9.6 ± 1.1 × 7.6 ± 0.7                   | 1.3       | /                                     | /                                       | /         |
|                       | CAASZY14      | 42.8–63.0 × 3.6–7.3                   | 13.6–16.6 × 6.1–7.5                   | 15.1 ± 0.8 × 6.6 ± 0.3                  | 2.3       | 5.9–11.1 × 4.8–9.1                    | 8.4 ± 1.3 × 7.2 ± 1.1                   | 1.3       | /                                     | /                                       | /         |
| <i>C. magnum</i>      | CAASZF5       | 84.7–126.6 × 3.9–6.5                  | 14.8–19.1 × 4.7–7.5                   | 17.3 ± 1.2 × 6.3 ± 0.6                  | 2.9       | 7.0–13.4 × 6.0–11.3                   | 10.8 ± 1.4 × 6.0 ± 1.2                  | 1.4       | /                                     | /                                       | /         |
|                       | CAASZK1       | 85.3–163.4 × 3.6–5.9                  | 13.7–19.8 × 4.3–6.5                   | 16.9 ± 1.5 × 5.4 ± 0.5                  | 3.2       | 6.7–16.1 × 8.4–16.6                   | 13.5 ± 2.5 × 10.7 ± 2.0                 | 1.3       | /                                     | /                                       | /         |
|                       | CAASZK3       | 109.3–220.6 × 3.9–5.6                 | 17.6–21.5 × 4.9–6.3                   | 19.0 ± 1.0 × 5.4 ± 0.5                  | 3.6       | 8.6–15.8 × 5.1–10.9                   | 12.6 ± 1.8 × 7.7 ± 0.9                  | 1.7       | /                                     | /                                       | /         |
|                       | CAASZK34      | 97.5–195.0 × 3.3–5.9                  | 13.8–24.1 × 4.4–6.5                   | 18.3 ± 2.4 × 5.5 ± 0.5                  | 3.3       | 8.4–15.9 × 4.9–11.4                   | 11.8 ± 1.8 × 4.9 ± 11.4                 | 1.5       | /                                     | /                                       | /         |
| <i>C. nigrum</i>      | CAASZX53      | /                                     | 10.9–16.7 × 3.5–6.5                   | 13.6 ± 1.7 × 4.5 ± 0.6                  | 3.1       | 8.8–17.8 × 5.7–8.5                    | 12.8 ± 2.1 × 7.0 ± 0.9                  | 1.8       | /                                     | /                                       | /         |
|                       | CAASZX80      | /                                     | 9.7–17.7 × 3.1–4.8                    | 11.7 ± 1.1 × 4.0 ± 0.4                  | 2.9       | 9.5–18.7 × 6.2–8.3                    | 13.1 ± 2.2 × 7.4 ± 0.6                  | 1.8       | /                                     | /                                       | /         |
| <i>C. nymphaeae</i>   | CAASZN14      | /                                     | 10.5–15.8 × 3.1–6.3                   | 13.3 ± 1.5 × 4.2 ± 0.7                  | 3.2       | 7.8–12.4 × 5.4–9.4                    | 9.7 ± 1.2 × 7.1 ± 1.0                   | 1.4       | /                                     | /                                       | /         |
|                       | CAASZN52      | /                                     | 11.5–17.9 × 3.7–6.1                   | 14.1 ± 1.4 × 4.8 ± 0.5                  | 3.0       | 7.1–10.5 × 5.7–8.0                    | 8.9 ± 0.9 × 6.9 ± 0.7                   | 1.3       | /                                     | /                                       | /         |
| <i>C. orbiculare</i>  | CAASZN2       | 39.6–73.74 × 3.9–6.0                  | 10.0–13.0 × 3.1–6.1                   | 11.3 ± 0.7 × 5.2 ± 0.6                  | 2.2       | 8.1–13.9 × 5.2–8.5                    | 10.5 ± 1.3 × 6.7 ± 1.0                  | 1.6       | /                                     | /                                       | /         |
|                       | CAASZJ2       | 35.1–56.0 × 3.7–5.4                   | 10.0–15.8 × 5.2–6.9                   | 12.6 ± 1.3 × 6.1 ± 0.5                  | 2.2       | 7.8–10.9 × 5.3–6.9                    | 9.3 ± 1.0 × 6.0 ± 0.5                   | 1.6       | /                                     | /                                       | /         |
|                       | CAASZT46      | /                                     | 9.5–12.5 × 5.3–6.6                    | 11.2 ± 0.8 × 5.9 ± 0.3                  | 1.9       | 8.7–16.3 × 5.3–7.7                    | 10.4 ± 1.8 × 6.5 ± 0.6                  | 1.6       | /                                     | /                                       | /         |
|                       | CAASZK46      | 36.4–59.8 × 3.4–6.1                   | 10.0–15.5 × 4.6–6.9                   | 12.7 ± 1.4 × 5.4 ± 0.6                  | 2.4       | 6.4–11.4 × 4.4–7.8                    | 8.9 ± 1.1 × 5.8 ± 0.8                   | 1.0       | /                                     | /                                       | /         |

**Table S3.** (cont.)

| Species             | Strain number | Seta on SNA                           | Conidia on PDA                        |                                         |           | Appresoria on PDA                     |                                         |           | Ascospores on OA                      |                                         |           |
|---------------------|---------------|---------------------------------------|---------------------------------------|-----------------------------------------|-----------|---------------------------------------|-----------------------------------------|-----------|---------------------------------------|-----------------------------------------|-----------|
|                     |               | Length (μm) × Width (μm) <sup>1</sup> | Length (μm) × Width (μm) <sup>1</sup> | Means ± SD of conidia size <sup>2</sup> | L/W ratio | Length (μm) × Width (μm) <sup>1</sup> | Means ± SD of conidia size <sup>2</sup> | L/W ratio | Length (μm) × Width (μm) <sup>1</sup> | Means ± SD of conidia size <sup>2</sup> | L/W ratio |
|                     | CAASZA9       | /                                     | 10.7–18.3 × 4.1–6.1                   | 13.7 ± 1.9 × 4.9 ± 0.6                  | 2.8       | 8.2–14.8 × 5.9–10.8                   | 11.5 ± 1.4 × 8.5 ± 1.1                  | 1.4       | 13.5–20.1 × 5.5–7.5                   | 17.5 ± 1.6 × 6.5 ± 0.5                  | 3.2       |
|                     | CAASZA30      | /                                     | 12.4–16.5 × 5.6–6.4                   | 14.6 ± 1.1 × 6.2 ± 0.6                  | 2.4       | 8.3–14.5 × 6.0–8.9                    | 12.6 ± 1.6 × 7.5 ± 0.6                  | 1.7       | /                                     | /                                       | /         |
| <i>C. qilinense</i> | CAASZK13      | 82.7–203.3 × 3.5–6.8                  | 17.5–23.2 × 4.7–6.0                   | 19.7 ± 1.4 × 5.4 ± 0.4                  | 3.7       | 8.1–15.8 × 5.1–10.8                   | 10.6 ± 2.1 × 7.7 ± 1.5                  | 1.4       | /                                     | /                                       | /         |
| <i>C. sojæ</i>      | CAASZM39      | /                                     | 13.1–18.7 × 4.6–7.1                   | 15.9 ± 1.5 × 6.0 ± 0.5                  | 2.7       | 8.2–16.7 × 7.1–11.9                   | 12.9 ± 2.2 × 7.1 ± 11.9                 | 1.4       | /                                     | /                                       | /         |
|                     | CAASZM32      | 70.2–158.4 × 3.9–6.1                  | 12.7–19.1 × 4.7–6.6                   | 16.3 ± 1.5 × 5.6 ± 0.5                  | 2.8       | 8.5–14.0 × 6.3–9.2                    | 10.4 ± 1.3 × 7.6 ± 0.7                  | 1.4       | /                                     | /                                       | /         |
| <i>C. truncatum</i> | CAASZX14      | 65.0–187.4 × 3.7–7.5                  | 27.0–33.1 × 3.3–5.4                   | 30.6 ± 1.7 × 4.3 ± 0.5                  | 6.5       | 6.5–10.5 × 4.6–8.7                    | 9.1 ± 0.9 × 6.3 ± 0.8                   | 1.5       | /                                     | /                                       | /         |
|                     | CAASZG10      | 77.9–140.6 × 5.3–8.7                  | 23.2–29.8 × 3.3–4.7                   | 26.1 ± 1.6 × 3.8 ± 0.4                  | 7.0       | 8.8–15.5 × 5.6–9.4                    | 11.9 ± 1.7 × 7.4 ± 0.8                  | 1.6       | /                                     | /                                       | /         |
|                     | CAASZG41      | 67.3–236.9 × 4.8–7.1                  | 18.8–28.0 × 3.3–5.6                   | 24.8 ± 2.1 × 3.3 ± 5.6                  | 5.7       | 8.0–17.6 × 4.9–9.7                    | 11.4 ± 2.1 × 7.4 ± 1.1                  | 1.6       | /                                     | /                                       | /         |

1 Numbers indicate minimum and maximum sizes for length or width of 30 seta, conidia, and appresoria recorded from the representative strains of *Colletotrichum* spp. obtained in this study.

2 Significance at P = 0.05 level. Numbers indicate mean conidia, appresoria sizes of each representative strain calculated by the statistical analysis. Data were analyzed with SPSS Statistics 19.0 (WinWrap® Basic; <http://www.winwrap.com>) by one-way ANOVA, and means were compared using Duncan's test at a significance level of P = 0.05. SD: standard deviation.
