# Supplementary material for: Colletotrichum Species Associated with Anthracnose Disease of Watermelon (Citrullus lanatus) in China
Source: MDPI journal article supplement (doi:10.3390/jof8080790), 2022-07-28
Supplement: s1 [file s1]

**Table S2.** Strains of the *Colletotrichum* species in this paper with details about host and location, and Genbank No

| Species                 | Accession No <sup>1</sup> | Host                                                  | Location    | GenBank No <sup>2</sup> |              |              |             |             |             |                 |
|-------------------------|---------------------------|-------------------------------------------------------|-------------|-------------------------|--------------|--------------|-------------|-------------|-------------|-----------------|
|                         |                           |                                                       |             | ITS                     | <i>gadph</i> | <i>chs-1</i> | <i>his3</i> | <i>act1</i> | <i>tub2</i> | <i>gs</i>       |
| <i>C. acutatum</i>      | CBS 144.29                | <i>Capsicum annuum</i> , fruit                        | Sri Lanka   | JQ948401                | JQ948732     | JQ949062     | —           | JQ949722    | JQ950052    | —               |
|                         | <b>CBS 112996*</b>        | <i>Carica papaya</i>                                  | Australia   | JQ005776                | JQ948677     | JQ005797     | —           | JQ005839    | JQ005860    | —               |
| <i>C. aenigma</i>       | <b>ICMP 18608*</b>        | <i>Persea americana</i>                               | Israel      | JX010244                | JX010044     | JX009774     | —           | JX009443    | JX010389    | —               |
|                         | ICMP 18686                | <i>Pyrus pyrifolia</i>                                | Japan       | JX010243                | JX009913     | JX009789     | —           | JX009519    | JX010390    | —               |
| <i>C. aeschynomenes</i> | <b>ICMP 17673*</b>        | <i>Aeschynomene virginica</i>                         | USA         | JX010176                | JX009930     | JX009799     | —           | JX009483    | JX010392    | —               |
| <i>C. alatae</i>        | <b>CBS 304.67*</b>        | <i>Dioscorea alata</i>                                | India       | JX010190                | JX009990     | JX009837     | —           | JX009471    | JX010383    | —               |
| <i>C. alienum</i>       | <b>ICMP 12071*</b>        | <i>Malus domestica</i>                                | New Zealand | JX010251                | JX010028     | JX009882     | —           | JX009572    | JX010411    | —               |
| <i>C. annellatum</i>    | <b>CH1*</b>               | <i>Hevea brasiliensis</i> , leaf                      | Colombia    | JQ005222                | JQ005309     | JQ005396     | JQ005483    | JQ005570    | JQ005656    | —               |
| <i>C. aotearoa</i>      | <b>ICMP 18537*</b>        | <i>Coprosma</i> sp.                                   | New Zealand | JX010205                | JX010005     | JX009853     | —           | JX009564    | JX010420    | —               |
| <i>C. arenicola</i>     | <b>CGMCC 3.19667*</b>     | <i>Areca catechu</i>                                  | China       | MK914635                | MK935455     | MK935541     | —           | MK935374    | MK935498    | —               |
| <i>C. artocarpicola</i> | <b>MFLUCC 18-1167*</b>    | <i>Artocarpus heterophyllus</i>                       | Thailand    | MN415991                | MN435568     | MN435569     | —           | MN435570    | MN435567    | —               |
| <i>C. asianum</i>       | <b>ICMP 18580*</b>        | <i>Coffea arabica</i>                                 | Thailand    | FJ972612                | JX010053     | JX009867     | —           | JX009584    | JX010406    | —               |
| <i>C. beeveri</i>       | <b>ICMP 18594*</b>        | <i>Brachyglottis repanda</i>                          | New Zealand | JQ005171                | JQ005258     | JX009842     | JQ005432    | JQ005519    | JQ005605    | —               |
| <i>C. bidentis</i>      | <b>COAD 1020*</b>         | <i>Bidens subalternans</i>                            | Brazil      | KF178481                | KF178506     | JX009843     | KF178554    | KF178578    | KF178602    | <b>KF178627</b> |
| <i>C. boninense</i>     | CBS 128526                | <i>Dacrycarpus dacrydioides</i> , leaf endophyte      | New Zealand | JQ005162                | JQ005249     | JX009844     | —           | JQ005510    | JQ005596    | —               |
|                         | <b>MAFF 305972*</b>       | <i>Crinum asiaticum</i> var. <i>sinicum</i>           | Japan       | JQ005153                | JQ005240     | JX009845     | JQ005414    | JQ005501    | JQ005588    | —               |
|                         | CBS 128526                | <i>Dacrycarpus dacrydioides</i> , leaf                | New Zealand | JQ005162                | JQ005249     | JX009846     | JQ005423    | JQ005510    | JQ005596    | —               |
|                         | CBS 129831                | <i>Leucospermum</i> sp.                               | Australia   | JQ005161                | JQ005248     | JX009847     | JQ005422    | JQ005509    | JQ005595    | —               |
| <i>C. brasiliense</i>   | <b>PAS12*</b>             | <i>Passiflora edulis</i> , fruit anthracnose          | Brazil      | JQ005235                | JQ005322     | JX009848     | JQ005496    | JQ005583    | JQ005669    | —               |
| <i>C. brassicicola</i>  | <b>LYN 16331*</b>         | <i>Brassica oleracea</i> var. <i>gemmifera</i> , leaf | New Zealand | JQ005172                | JQ005259     | JX009849     | JQ005433    | JQ005520    | JQ005606    | —               |
| <i>C. brevisporum</i>   | <b>BCC 38876*</b>         | <i>Neoregalia</i> sp.                                 | Thailand    | JN050238                | JN050227     | JX009850     | —           | JN050216    | JN050244    | —               |
|                         | CBS 129958                | <i>Anthurium</i> sp.                                  | Thailand    | MG600763                | MG600823     | JX009851     | MG600909    | MG600967    | MG601030    | —               |
| <i>C. cacao</i>         | <b>CBS 119297*</b>        | <i>Theobroma cacao</i>                                | Costa Rica  | MG600772                | MG600832     | JX009852     | MG600916    | MG600976    | MG601039    | —               |
| <i>C. camelliae</i>     | <b>CGMCC 3.14925*</b>     | <i>Camellia sinensis</i>                              | China       | KJ955081                | KJ954782     | MZ799255     | MZ673847    | KJ954363    | KJ955230    | —               |
| <i>C. carthami</i>      | <b>SAPA100011*</b>        | <i>Carthamus tinctorium</i>                           | Japan       | AB696998                | —            | JX009853     | —           | —           | AB696992    | —               |
| <i>C. cattleyicola</i>  | <b>CBS 170.49*</b>        | <i>Cattleya</i> sp.                                   | Belgium     | MG600758                | MG600819     | JX009854     | MG600905    | MG600963    | MG601025    | —               |
| <i>C. chlorophyti</i>   | <b>IMI 103806*</b>        | <i>Chlorophytum</i> sp.                               | India       | GU227894                | GU228286     | JX009855     | —           | GU227992    | GU228188    | —               |
|                         | CBS 142.79                | <i>Stylosanthes hamata</i>                            | Australia   | GU227895                | GU228287     | JX009856     | —           | GU227993    | GU228189    | —               |

Table S2. (cont.)

| Species                  | Accession No <sup>1</sup> | Host                                                     | Location     | GenBank No <sup>2</sup> |              |              |             |             |             |           |
|--------------------------|---------------------------|----------------------------------------------------------|--------------|-------------------------|--------------|--------------|-------------|-------------|-------------|-----------|
|                          |                           |                                                          |              | ITS                     | <i>gadph</i> | <i>chs-1</i> | <i>his3</i> | <i>act1</i> | <i>tub2</i> | <i>gs</i> |
| <i>C. changpingense</i>  | CGMCC 3.17582*            | <i>Rhizome of Fragaria × ananass</i>                     | China        | KP683152                | KP683152     | KP852449     | —           | KP683093    | MZ673952    | —         |
| <i>C. chrysanthemi</i>   | CBS 126519                | <i>Chrysanthemum coronarium</i> , vascular discoloration | Netherlands  | JQ948272                | JQ948602     | JQ948933     | —           | JQ949593    | JQ949923    | —         |
| <i>C. chrysophilum</i>   | CMM 4268*                 | <i>Musa sp.</i>                                          | Brazil       | KX094252                | KX094183     | KX094083     | —           | KX093982    | KX094285    | —         |
| <i>C. cigarro</i>        | ICMP 18539*               | <i>Olea europaea</i>                                     | Australia    | JX010230                | JX009966     | JX009800     | MZ673837    | JX009523    | JX010434    | —         |
| <i>C. circinans</i>      | CBS 221.81*               | <i>Allium cepa</i>                                       | Serbia       | GU227855                | GU228247     | JX009858     | —           | GU227953    | GU228149    | —         |
| <i>C. clidemiae</i>      | ICMP 18658*               | <i>Clidemia hirta</i>                                    | USA, Hawaii  | JX010265                | JX009989     | JX009859     | —           | JX009537    | JX010438    | —         |
| <i>C. cliviicola</i>     | CBS 125375*               | <i>Clivia miniata</i>                                    | China        | MG600733                | MG600795     | JX009860     | MG600892    | MG600939    | MG601000    | —         |
|                          | CSSS2                     | <i>Clivia miniata</i>                                    | China        | GU109480                | GU085868     | JX009861     | —           | GU085862    | GU085870    | —         |
|                          | CBS 133705                | <i>Clivia sp.</i>                                        | South Africa | MG600732                | MG600794     | JX009862     | MG600891    | MG600938    | MG600999    | —         |
| <i>C. cobbittense</i>    | BRIP 66219*               | <i>Cordyline stricta × C. australis</i>                  | Australia    | MH087016                | MH094133     | MH094135     | MH094136    | MH094134    | MH094137    | —         |
| <i>C. coccodes</i>       | CBS 164.49                | <i>Solanum tuberosum</i>                                 | Netherlands  | JQ005775                | HM171672     | JX009863     | —           | JQ005838    | JQ005859    | —         |
|                          | CBS 369.75*               | <i>Solanum tuberosum</i>                                 | Netherlands  | HM171679                | HM171667     | JX009864     | —           | JX546681    | HM171673    | —         |
| <i>C. colombiense</i>    | G2*                       | <i>Passiflora edulis</i> , leaf                          | Colombia     | JQ005174                | JQ005261     | JX009865     | JQ005435    | JQ005522    | JQ005608    | —         |
| <i>C. conoides</i>       | CGMCC 3.17615*            | <i>Capsicum annuum</i>                                   | China        | KP890168                | KP890162     | JX009866     | —           | KP890144    | KP890174    | —         |
|                          | CAUG33                    | <i>Capsicum annuum</i>                                   | China        | KP890169                | KP890163     | JX009867     | —           | KP890145    | KP890175    | —         |
|                          | CAUG34                    | <i>Capsicum annuum</i>                                   | China        | KP890170                | KP890164     | JX009868     | —           | KP890146    | KP890176    | —         |
| <i>C. constrictum</i>    | ICMP 12941*               | <i>Citrus limon</i> , fruit                              | New Zealand  | JQ005238                | JQ005325     | JX009869     | JQ005499    | JQ005586    | JQ005672    | —         |
| <i>C. cordylinicola</i>  | MFLUCC 090551*            | <i>Cordyline fruticosa</i>                               | Thailand     | JX010226                | JX009975     | JX009870     | —           | HM470235    | JX010440    | —         |
| <i>C. cosmi</i>          | CBS 853.73*               | <i>Cosmos sp.</i> , seed                                 | Netherlands  | JQ948274                | JQ948604     | JX009871     | —           | JQ949595    | JQ949925    | —         |
| <i>C. cymbidiicola</i>   | IMI 347923*               | <i>Cymbidium sp.</i> , leaf                              | Australia    | JQ005166                | JQ005253     | JX009872     | JQ005427    | JQ005514    | JQ005600    | —         |
| <i>C. dacrycarpi</i>     | ICMP 19107*               | <i>Dacrycarpus dacrydioides</i> , leaf                   | New Zealand  | JQ005236                | JQ005323     | JX009873     | JQ005497    | JQ005584    | JQ005670    | —         |
| <i>C. dimorphum</i>      | YMF1.07303                | <i>Ageratina adenophora</i>                              | China        | OK030866                | OK513669     | OK513565     | —           | OK513605    | OK513635    | —         |
|                          | CGMCC 3.16083             | <i>Ageratina adenophora</i>                              | China        | OK030867                | OK513670     | OK513566     | —           | OK513606    | OK513636    | —         |
| <i>C. dracaenophilum</i> | CBS 118199*               | <i>Dracaena sanderana</i>                                | China        | JX519222                | JX546707     | JX009874     | —           | JX519238    | JX519247    | —         |
| <i>C. endophytica</i>    | LC0324*                   | <i>Pennisetum purpureum</i>                              | Thailand     | KC633854                | KC832854     | JX009875     | MZ673839    | KF306258    | MZ673954    | —         |
| <i>C. fioriniae</i>      | CBS 127601                | <i>Mangifera indica</i> , stem                           | Australia    | JQ948311                | JQ948641     | JX009876     | —           | JQ949632    | JQ949962    | —         |
|                          | CBS 128517*               | <i>Fiorinia sp.</i>                                      | USA          | JQ948292                | JQ948622     | JX009877     | —           | JQ949613    | JQ949943    | —         |
| <i>C. fructi</i>         | CBS 346.37*               | <i>Malus sylvestris</i>                                  | USA          | GU227844                | GU228236     | JX009878     | —           | GU227942    | GU228138    | —         |
| <i>C. fructicola</i>     | ICMP 18613                | <i>Limonium sinuatum</i>                                 | Israel       | JX010167                | JX009998     | JX009879     | —           | JX009491    | JX010388    | —         |
|                          | ICMP 18120                | <i>Dioscorea alata</i>                                   | Nigeria      | JX010182                | JX010041     | JX009880     | —           | JX009436    | JX009436    | —         |
|                          | CBS 125395                | <i>Theobroma cacao</i>                                   | Panama       | JX010172                | JX009992     | JX009881     | —           | JX009543    | JX010408    | —         |

Table S2. (cont.)

| Species                                            | Accession No <sup>1</sup> | Host                                         | Location       | GenBank No <sup>2</sup> |              |              |             |             |             |           |
|----------------------------------------------------|---------------------------|----------------------------------------------|----------------|-------------------------|--------------|--------------|-------------|-------------|-------------|-----------|
|                                                    |                           |                                              |                | ITS                     | <i>gadph</i> | <i>chs-1</i> | <i>his3</i> | <i>act1</i> | <i>tub2</i> | <i>gs</i> |
| <i>C. fructivorum</i><br><i>C. gloeosporioides</i> | ICMP 18581*               | <i>Coffea arabica</i>                        | Thailand       | JX010165                | JX010033     | JX009882     | —           | FJ907426    | JX010405    | —         |
|                                                    | ICMP 18727                | <i>Fragaria × ananassa</i>                   | USA            | JX010179                | JX010035     | JX009883     | —           | JX009565    | JX010394    | —         |
|                                                    | CBS 125397                | <i>Tetragastris panamensis</i>               | Panama         | JX010173                | JX010032     | JX009884     | —           | JX009581    | JX010409    | —         |
|                                                    | CBS 238.49(*)             | <i>Ficus edulis</i>                          | Germany        | JX010181                | X009923      | JX009885     | —           | JX009495    | JX010400    | —         |
|                                                    | CBS 133125*               | <i>Vaccinium macrocarpon</i>                 | USA            | JX145145                | MZ664047     | JX009886     | —           | MZ664126    | JX145196    | —         |
|                                                    | IMI 356878*               | <i>Citrus sinensis</i>                       | Italy          | JX010152                | JX010056     | JX009887     | —           | JX009531    | JX010445    | —         |
|                                                    | ICMP 12939                | <i>Citrus</i> sp.                            | New Zealand    | JX010149                | JX009931     | JX009888     | —           | JX009462    | —           | —         |
|                                                    | ICMP 12938                | <i>Citrus sinensis</i>                       | New Zealand    | JX010147                | JX009935     | JX009889     | —           | JX009560    | —           | —         |
|                                                    | ICMP 18694                | <i>Mangifera indica</i>                      | South Africa   | JX010155                | JX009980     | JX009890     | —           | JX009481    | —           | —         |
|                                                    | ICMP 18695                | <i>Citrus</i> sp.                            | USA            | JX010153                | JX009979     | JX009891     | —           | JX009494    | —           | —         |
|                                                    | ICMP 18697                | <i>Vitis vinifera</i>                        | USA            | JX010154                | JX009987     | JX009892     | —           | JX009557    | —           | —         |
|                                                    | CBS 273.51                | <i>Citrus limon</i>                          | Italy          | JX010148                | JX010054     | JX009893     | —           | JX009558    | —           | —         |
|                                                    | CBS 953.97*               | <i>Citrus sinensis</i>                       | Italy          | GQ485605                | GQ856762     | JX009894     | —           | GQ856782    | GQ849434    | —         |
|                                                    | CORCG5                    | <i>Vanda</i> sp.                             | China          | HM034809                | HM034807     | JX009895     | —           | HM034801    | HM034811    | —         |
|                                                    | CBS 112999*               | <i>Citrus sinensis</i>                       | Italy          | JQ005152                | JQ005239     | JX009896     | JQ005413    | JQ005500    | JQ005587    | —         |
| <i>C. graminicola</i>                              | CBS 130836*               | <i>Zea mays</i>                              | USA            | JQ005767                | —            | JX009897     | —           | JQ005830    | JQ005851    | —         |
| <i>C. grevillea</i>                                | CBS 132879*               | <i>Grevillea</i> sp.                         | Italy          | KC297078                | KC297010     | KC296987     | KC297056    | KC296941    | KC297102    | —         |
| <i>C. grossum</i>                                  | CGMCC 3.17614*            | <i>Capsicum</i> sp.                          | China          | KP890165                | KP890159     | JX009899     | —           | KP890141    | KP890171    | —         |
|                                                    | CAU31                     | <i>Capsicum</i> sp.                          | China          | KP890166                | KP890160     | JX009900     | —           | KP890142    | KP890172    | —         |
| <i>C. hebeiense</i>                                | CGMCC 3.17464*            | <i>Vitis vinifera</i> cv. Cabernet Sauvignon | China          | KF156863                | KF377495     | JX009901     | —           | KF377532    | KF288975    | —         |
| <i>C. hedericola</i>                               | MFLU 15-0689*             | <i>Hedera helix</i>                          | Italy          | MN631384                | —            | MN635794     | —           | MN635795    | —           | —         |
| <i>C. helleniense</i>                              | CPC 26844*                | <i>Poncirus trifoliata</i>                   | Greece, Arta   | KY856446                | KY856270     | KY856186     | KY856361    | KY856019    | KY856528    | —         |
| <i>C. henanense</i>                                | CGMCC 3.17354             | <i>C. sinensis</i> , pathogen                | China          | KJ955109                | —            | JX009902     | MZ673835    | —           | KJ955257    | —         |
| <i>C. hippeastri</i>                               | CSSG1*                    | <i>Hippeastrum vittatum</i> , leaf           | China          | JQ005231                | JQ005318     | JX009903     | JQ005492    | JQ005579    | JQ005665    | —         |
|                                                    | CBS 241.78                | <i>Hippeastrum</i> sp.                       | Netherlands    | JX010293                | JX009932     | JX009904     | —           | JX009485    | —           | —         |
| <i>C. horii</i>                                    | NBRC 7478*                | <i>Diospyros kaki</i>                        | Japan          | GQ329690                | GQ329681     | JX009905     | —           | JX009438    | JX010450    | —         |
| <i>C. hymenocallidis</i>                           | ICMP 18642*               | <i>Hymenocallis americana</i>                | China          | JX010278                | JX010019     | JX009906     | —           | GQ856775    | JX010410    | —         |
|                                                    | CBS 125378                | <i>Hymenocallis americana</i>                | China          | JX010278                | JX010019     | JX009907     | —           | GQ856775    | JX010410    | —         |
| <i>C. hystrix</i>                                  | NBRC 7478*                | <i>Citrus hystrix</i>                        | Italy, Catania | KY856450                | KY856274     | KY856190     | KY856365    | KY856023    | KY856532    | —         |

Table S2. (cont.)

| Species                   | Accession No <sup>1</sup> | Host                                | Location            | GenBank No <sup>2</sup> |              |              |             |             |             |           |
|---------------------------|---------------------------|-------------------------------------|---------------------|-------------------------|--------------|--------------|-------------|-------------|-------------|-----------|
|                           |                           |                                     |                     | ITS                     | <i>gadph</i> | <i>chs-1</i> | <i>his3</i> | <i>act1</i> | <i>tub2</i> | <i>gs</i> |
| <i>C. jiangxiense</i>     | CGMCC 3.17363*            | <i>Camellia sinensis</i> , pathogen | China               | KJ955201                | KJ954902     | JX009908     | —           | KJ954471    | OK236389    | —         |
| <i>C. kahawae</i>         | IMI 319418*               | <i>Coffea arabica</i>               | Kenya               | JX010231                | JX010012     | JX009912     | MZ673838    | JX009452    | JX010444    | —         |
| <i>C. karstii</i>         | CBS 129927                | <i>Anthurium</i> sp.                | Thailand            | JQ005206                | JQ005293     | JX009913     | JQ005467    | JQ005554    | JQ005640    | —         |
|                           | CBS 128524                | <i>Citrullus lanatus</i> , fruit    | New Zealand         | JQ005195                | JQ005282     | JX009914     | JQ005456    | JQ005543    | JQ005629    | —         |
|                           | MAFF 305998               | <i>Cucumis melo</i>                 | Japan               | JQ005191                | JQ005278     | JX009915     | JQ005452    | JQ005539    | JQ005625    | —         |
|                           | CBS 110779                | <i>Eucalyptus grandis</i>           | South Africa        | JQ005198                | JQ005285     | JX009916     | JQ005459    | JQ005546    | JQ005632    | —         |
|                           | CBS 127552                | <i>Eugenia uniflora</i>             | Brazil              | JQ005217                | JQ005304     | JX009917     | JQ005478    | JQ005565    | JQ005651    | —         |
|                           | CBS 130235                | <i>Gossypium hirsutum</i>           | Germany             | JQ005190                | JQ005277     | JX009918     | JQ005451    | JQ005538    | JQ005624    | —         |
|                           | CBS 113087                | <i>Malus</i> sp.                    | USA                 | JQ005181                | JQ005268     | JX009919     | JQ005442    | JQ005529    | JQ005615    | —         |
|                           | CBS 118401                | <i>Pachira</i> sp., living leaves   | China               | JQ005192                | JQ005279     | JX009920     | JQ005453    | JQ005540    | JQ005626    | —         |
|                           | CGMCC 3.14194*            | <i>Vanda</i> sp.                    | China               | HM585409                | HM585391     | JX009921     | —           | HM581995    | HM585428    | —         |
| <i>C. lindemuthianum</i>  | CBS 571.97                | <i>Phaseolus vulgaris</i>           | Brazil              | JX546818                | JX546722     | JX009925     | JX546770    | JX546626    | JX546864    | KF178629  |
|                           | CBS 151.56                | <i>Phaseolus vulgaris</i>           | France              | JX546812                | JX546716     | JX009926     | JX546764    | JX546620    | JX546858    | KF178633  |
|                           | CBS 144.31*               | <i>Phaseolus vulgaris</i>           | Germany             | JQ005779                | JX546712     | JX009927     | JQ005821    | JQ005842    | JQ005863    | KF178643  |
|                           | CBS 152.28                | <i>Phaseolus vulgaris</i>           | Netherlands         | JX546813                | JX546717     | JX009928     | JX546765    | JX546621    | JX546859    | KF178642  |
|                           | CBS 130841                | <i>Phaseolus vulgaris</i>           | USA                 | JX546819                | JX546723     | JX009929     | JX546771    | JX546627    | JX546865    | KF178632  |
|                           | CBS 523.97                | <i>Phaseolus coccineus</i>          | Costa Rica          | JX546815                | JX546719     | JX009930     | —           | JX546623    | JX546861    | —         |
| <i>C. lineola</i>         | CBS 125337*               | <i>Apiaceae</i>                     | Czech Republic      | GU227829                | GU228221     | JX009931     | —           | GU227927    | GU228123    | —         |
| <i>C. liriopes</i>        | CBS 119444*               | <i>Liriope muscari</i>              | Mexico              | GU227804                | GU228196     | JX009932     | —           | GU227902    | GU228098    | —         |
| <i>C. lobatum</i>         | IMI 79736*                | <i>Piper catalpaefolium</i>         | Trinidad and Tobago | MG600768                | MG600828     | JX009933     | MG600912    | MG600972    | MG601035    | —         |
| <i>C. magnum</i>          | CBS 519.97*               | <i>Citrullus lanatus</i>            | USA                 | MG600769                | MG600829     | JX009934     | MG600913    | MG600973    | MG601036    | —         |
|                           | IMI 391662                | <i>Citrullus lanatus</i>            | USA                 | MG600771                | MG600831     | JX009935     | MG600915    | MG600975    | MG601038    | —         |
|                           | CBS 575.97                | <i>Citrullus lanatus</i>            | USA                 | MG600770                | MG600830     | JX009936     | MG600914    | MG600974    | MG601037    | —         |
|                           | CAUOS2(*)                 | Chili pepper                        | China               | MZ595839                | MZ848400     | OK236385     | MZ673858    | OK236387    | MZ67396     | —         |
| <i>C. makassarensense</i> | CBS 143664*               | <i>Capsicum annuum</i>              | Indonesia           | MH728812                | MH728820     | MH805850     | —           | MH781480    | MH846563    | —         |
| <i>C. malvarum</i>        | CBS 521.97*               | <i>Lavatera trimestris</i>          | UK                  | KF178480                | KF178504     | JX009937     | KF178553    | KF178577    | KF178601    | KF178626  |
| <i>C. merremiae</i>       | CBS 124955*               | <i>Merremia umbellata</i>           | Panama              | MG600765                | MG600825     | JX009938     | MG600910    | MG600969    | MG601032    | —         |
| <i>C. nanhuaensis</i>     | CGMCC 3.18962             | <i>Ageratina adenophora</i>         | China               | OK030870                | OK513673     | OK513569     | —           | OK513609    | OK513639    | —         |
|                           | YMF1.04990                | <i>Ageratina adenophora</i>         | China               | OK030871                | OK513674     | OK513570     | —           | OK513610    | OK513640    | —         |
| <i>C. musae</i>           | CBS 116870*               | <i>Musa</i> sp.                     | USA                 | JX010146                | JX010050     | JX009939     | —           | JX009433    | HQ596280    | —         |

Table S2. (cont.)

| Species                   | Accession No <sup>1</sup> | Host                                         | Location            | GenBank No <sup>2</sup> |              |              |             |             |             |           |
|---------------------------|---------------------------|----------------------------------------------|---------------------|-------------------------|--------------|--------------|-------------|-------------|-------------|-----------|
|                           |                           |                                              |                     | ITS                     | <i>gadph</i> | <i>chs-1</i> | <i>his3</i> | <i>act1</i> | <i>tub2</i> | <i>gs</i> |
| <i>C. musicola</i>        | CBS 132885*               | <i>Musa</i> sp.                              | Mexico              | MG600736                | MG600798     | JX009940     | MG600895    | MG600942    | MG601003    | —         |
| <i>C. nigrum</i>          | CBS 128507                | <i>Capsicum annuum</i>                       | New Zealand         | JX546843                | JX546747     | JX009941     | —           | JX546651    | JX546890    | —         |
|                           | CBS 169.49*               | <i>Capsicum</i> sp.                          | Argentina           | JX546838                | JX546742     | JX009942     | —           | JX546646    | JX546885    | —         |
| <i>C. novae-zelandiae</i> | ICMP 12944*               | <i>Capsicum annuum</i> , fruit               | New Zealand         | JQ005228                | JQ005315     | JX009943     | JQ005489    | JQ005576    | JQ005662    | —         |
| <i>C. nupharicola</i>     | CBS 470.96*               | <i>Nuphar lutea</i> subsp.                   | USA                 | JX010187                | JX009972     | JX009944     | —           | JX009437    | JX010398    | —         |
| <i>C. nymphaeae</i>       | CBS 129928, 216           | <i>Fragaria</i> × <i>ananassa</i>            | USA                 | JQ948228                | JQ948558     | JX009945     | —           | JQ949549    | JQ949879    | —         |
|                           | CBS 515.78*               | <i>Nymphaea alba</i> , leaf spot             | Netherlands         | JQ948197                | JQ948527     | JX009946     | —           | JQ949518    | JQ949848    | —         |
| <i>C. okinawense</i>      | MAFF 240517               | <i>Carica papaya</i>                         | Japan               | MG600767                | MG600827     | JX009947     | —           | MG600971    | MG601034    | —         |
| <i>C. oncidii</i>         | CBS 129828*               | <i>Oncidium</i> sp., leaf                    | Germany             | JQ005169                | JQ005256     | JX009948     | —           | JQ005517    | JQ005603    | —         |
| <i>C. orbiculare</i>      | CBS 129432                | <i>Benincasa hispida</i>                     | Australia           | KF178469                | KF178494     | JX009949     | KF178542    | KF178566    | KF178590    | KF178614  |
|                           | CBS 133194                | <i>Cucumis melo</i>                          | Japan               | KF178459                | KF178483     | JX009950     | KF178532    | KF178556    | KF178580    | KF178604  |
|                           | CBS 570.97*               | <i>Cucumis sativus</i>                       | Europe, probably UK | KF178466                | KF178490     | JX009951     | KF178539    | KF178563    | KF178587    | KF178603  |
|                           | CBS 173.59                | <i>Cucumis sativus</i>                       | Netherlands         | KF178463                | KF178487     | JX009952     | KF178536    | KF178560    | KF178584    | KF178608  |
|                           | CBS 122.24                | <i>Cucumis sativus</i>                       | UK                  | KF178467                | KF178492     | JX009953     | KF178540    | KF178564    | KF178588    | KF178612  |
| <i>C. orchidearum</i>     | CBS 135131*               | <i>Dendrobium nobile</i>                     | Netherlands         | MG600738                | MG600800     | JX009954     | MG600897    | MG600944    | MG601005    | —         |
| <i>C. panamense</i>       | CBS 125386*               | <i>Merremia umbellata</i>                    | Panama              | MG600766                | MG600826     | JX009955     | MG600911    | MG600970    | MG601033    | —         |
| <i>C. pandanicola</i>     | MFLUCC 17-0571*           | <i>Pandanaceae</i>                           | Thailand            | MG646967                | MG646934     | MG646931     | —           | MG646938    | MG646926    | —         |
| <i>C. parsonsiae</i>      | ICMP 18590*               | <i>Parsonsia capsularis</i> , leaf           | New Zealand         | JQ005233                | JQ005320     | JX009956     | JQ005494    | JQ005581    | JQ005667    | —         |
| <i>C. perseae</i>         | CBS 141365                | <i>Avocado</i>                               | Israel              | KX620308                | KX620242     | MZ799260     | —           | KX620145    | KX620341    | —         |
| <i>C. petchii</i>         | CBS 118774                | <i>Dracaena sanderana</i> , living stems     | China               | JQ005225                | JQ005312     | JX009957     | JQ005486    | JQ005573    | JQ005659    | —         |
| <i>C. phaseolorum</i> 1   | CBS 157.36                | <i>Phaseolus radiatus</i> var. <i>aureus</i> | Japan               | GU227896                | GU228288     | JX009958     | —           | GU227994    | GU228190    | —         |
| <i>C. phaseolorum</i> 2   | CBS 158.36                | <i>Vigna sinensis</i>                        | Japan               | GU227897                | GU228289     | JX009959     | —           | GU227995    | GU228191    | —         |
| <i>C. phyllanthi</i>      | MACS 271*                 | <i>Phyllanthus acidus</i>                    | India               | JQ005221                | JQ005308     | JX009960     | JQ005482    | JQ005569    | JQ005655    | —         |
| <i>C. piperis</i>         | CPC 21195*                | <i>Piper nigrum</i>                          | Malaysia            | MG600760                | MG600820     | JX009961     | MG600906    | MG600964    | MG601027    | —         |
| <i>C. plurivorum</i>      | MAFF 243073               | <i>Amorphophallus rivieri</i>                | Japan               | MG600730                | MG600793     | JX009962     | —           | MG600936    | MG600997    | —         |
|                           | CORCX9                    | <i>Arundina graminifolia</i>                 | China               | HM585398                | HM585381     | JX009963     | —           | HM581986    | HM585423    | —         |
|                           | LJTJ30*                   | <i>Capsicum annuum</i>                       | China               | KP748221                | KP823800     | JX009964     | —           | KP823741    | KP823853    | —         |
|                           | CBS 125474*               | <i>Coffea</i> sp.                            | Vietnam             | MG600718                | MG600781     | JX009965     | MG600887    | MG600925    | MG600985    | —         |
|                           | MAFF 306007               | <i>Lycopersicon</i>                          | Japan               | MG600728                | MG600791     | JX009966     | —           | MG600934    | MG600995    | —         |

Table S2. (cont.)

| Species                       | Accession No <sup>1</sup> | Host                         | Location     | GenBank No <sup>2</sup> |              |              |             |             |             |           |
|-------------------------------|---------------------------|------------------------------|--------------|-------------------------|--------------|--------------|-------------|-------------|-------------|-----------|
|                               |                           |                              |              | ITS                     | <i>gadph</i> | <i>chs-1</i> | <i>his3</i> | <i>act1</i> | <i>tub2</i> | <i>gs</i> |
| <i>C. proteae</i>             | CMM 3742                  | <i>Mangifera indica</i>      | Brazil       | KC702980                | KC702941     | JX009967     | —           | KC702908    | KC992327    | —         |
|                               | CBS 132882*               | <i>Protea</i> sp.            | South Africa | KC297079                | KC297009     | JX009968     | KC297045    | KC296940    | KC297101    | —         |
|                               | CBS 134301                | <i>Protea</i> sp.            | South Africa | KC842385                | KC842379     | JX009969     | —           | KC842373    | KC842387    | —         |
| <i>C. pseudotheobromicola</i> | MFLUCC 18—1602*           | <i>Prunus avium</i>          | China        | MH817395                | MH853675     | MH853678     | —           | MH853681    | MH853684    | —         |
| <i>C. psidii</i>              | CBS 145.29*               | <i>Psidium</i> sp.           | Italy        | JX010219                | JX009967     | JX009970     | —           | JX009515    | JX010443    | —         |
| <i>C. queenslandicum</i>      | ICMP 1778*                | <i>Carica papaya</i>         | Australia    | JX010276                | JX009934     | JX009971     | —           | JX009447    | JX010414    | —         |
| <i>C. rhexiae</i>             | CBS 133134*               | <i>Rhexia virginica</i>      | USA          | JX145128                | MZ664046     | JX009972     | MZ673834    | MZ664127    | JX145179    | —         |
| <i>C. rusci</i>               | CBS 119206*               | <i>Ruscus</i> sp.            | Italy        | GU227818                | GU228210     | JX009973     | —           | GU227916    | GU228112    | —         |
| <i>C. salsolae</i>            | ICMP 19051*               | <i>Salsola tragus</i>        | Hungary      | JX010242                | JX009916     | JX009974     | —           | JX009562    | JX010325    | —         |
| <i>C. siamense</i>            | ICMP 18578*               | <i>Coffea arabica</i>        | Thailand     | JX010171                | JX009924     | JX009975     | —           | FJ907423    | JX010404    | —         |
| <i>C. sidae</i>               | CBS 130420                | <i>Jasminum sambac</i>       | Vietnam      | HM131511                | HM131497     | JX009976     | —           | HM131507    | JX010415    | —         |
|                               | CBS 504.97*               | <i>Sida spinosa</i>          | USA          | KF178472                | KF178497     | JX009977     | KF178545    | KF178569    | KF178593    | KF178618  |
| <i>C. simmondsii</i>          | CBS130421                 | <i>Carica papaya</i> , fruit | Australia    | JQ948276                | JQ948606     | JX009978     | —           | JQ949597    | JQ949927    | —         |
| <i>C. sojae</i>               | SAUCC 1407                | <i>Arctium lappa</i>         | China        | KT362184                | KT362188     | JX009979     | —           | KT362189    | KT362185    | —         |
|                               | CAUOS5                    | <i>Capsicum</i> sp.          | China        | KP890107                | KP890138     | JX009980     | —           | —           | KP890114    | —         |
|                               | LFN0009                   | <i>Glycine max</i>           | Brazil       | KT696354                | KT696295     | JX009981     | KT696318    | KT696281    | KT696288    | —         |
| <i>C. spinosum</i>            | ATCC 62257*               | <i>Glycine max</i>           | USA          | MG600749                | MG600810     | JX009982     | MG600899    | MG600954    | MG601016    | —         |
|                               | CBS 515.97*               | <i>Xanthium spinosum</i>     | Australia    | KF178474                | KF178498     | JX009983     | KF178547    | KF178571    | KF178595    | KF178620  |
| <i>C. syzygiicola</i>         | MFLUCC 10-0624*           | <i>Syzygium samarangense</i> | Thailand     | KF242094                | KF242156     | —            | —           | KF157801    | KF254880    | —         |
| <i>C. tainanense</i>          | CBS 143666*               | <i>Capsicum annuum</i>       | Taiwan       | MH728818                | MH728823     | MH805845     | —           | MH781475    | MH846558    | —         |
| <i>C. tebestii</i>            | CBS 522.97*               | <i>Malva pusilla</i>         | Canada       | KF178473                | KF178505     | JX009984     | KF178546    | KF178570    | KF178594    | KF178619  |
| <i>C. temperatum</i>          | CBS 133122*               | <i>Vaccinium macrocarpon</i> | USA          | JX145159                | MZ664045     | JX009985     | MZ673833    | MZ664125    | JX145211    | —         |
| <i>C. theobromicola</i>       | CBS 124945*               | <i>Theobroma cacao</i>       | Panama       | JX010294                | JX010006     | JX009986     | —           | JX009444    | JX010447    | —         |
|                               | CBS 142.31                | <i>Fragaria × ananassa</i>   | USA          | JX010286                | JX010024     | JX009987     | —           | JX009516    | JX010373    | —         |
|                               | MUCL 42294                | <i>Stylosanthes viscosa</i>  | Australia    | JX010289                | JX009962     | JX009988     | —           | JX009575    | JX010380    | —         |
| <i>C. ti</i>                  | ICMP 4832*                | <i>Cordyline</i> sp.         | New Zealand  | JX010269                | JX009952     | JX009989     | —           | JX009520    | JX010442    | —         |
| <i>C. tofieldiae</i>          | CBS 495.85                | <i>Tofieldia calyculata</i>  | Switzerland  | GU227801                | GU228193     | JX009990     | —           | GU227899    | GU228095    | —         |
| <i>C. torulosum</i>           | ICMP 18586*               | <i>Solanum melongena</i>     | New Zealand  | JQ005164                | JQ005251     | JX009991     | JQ005425    | JQ005512    | JQ005598    | —         |
| <i>C. trichellum</i>          | CBS 217.64                | <i>Hedera helix</i>          | UK           | GU227812                | GU228204     | JX009993     | —           | GU227910    | GU228106    | —         |

Table S2. (cont.)

| Species                                            | Accession No <sup>1</sup> | Host                                               | Location            | GenBank No <sup>2</sup> |                 |                 |                 |                 |                 |                 |
|----------------------------------------------------|---------------------------|----------------------------------------------------|---------------------|-------------------------|-----------------|-----------------|-----------------|-----------------|-----------------|-----------------|
|                                                    |                           |                                                    |                     | ITS                     | <i>gadph</i>    | <i>chs-1</i>    | <i>his3</i>     | <i>act1</i>     | <i>tub2</i>     | <i>gs</i>       |
| <i>C. trifolii</i>                                 | <b>CBS 158.83*</b>        | <b>Trifolium</b>                                   | <b>USA</b>          | <b>KF178478</b>         | <b>KF178502</b> | <b>JX009994</b> | <b>KF178551</b> | <b>KF178575</b> | <b>KF178599</b> | <b>KF178624</b> |
| <i>C. tropicale</i>                                | <b>CBS 124949*</b>        | <i>Theobroma cacao</i>                             | <b>Panama</b>       | <b>JX010264</b>         | <b>JX010007</b> | <b>JX009995</b> | <b>MZ673832</b> | <b>JX009489</b> | <b>JX010407</b> | —               |
| <i>C. tropicicola1</i>                             | <b>MFLUCC 110114*</b>     | <i>Citrus maxima</i>                               | <b>Thailand</b>     | <b>JN050240</b>         | <b>JN050229</b> | <b>JX009996</b> | —               | <b>JN050218</b> | <b>JN050246</b> | —               |
| <i>C. tropicicola2</i>                             | MFLUCC 100167             | <i>Paphiopedilum bellatulum</i>                    | Thailand            | JN050241                | JN050230        | JX009997        | —               | JN050219        | JN050247        | —               |
| <i>C. truncatum</i>                                | <b>CBS 151.35*</b>        | <i>Phaseolus lunatus</i>                           | <b>USA</b>          | <b>GU227862</b>         | <b>GU228254</b> | <b>JX009998</b> | —               | <b>GU227960</b> | <b>GU228156</b> | —               |
|                                                    | CBS 120709                | <i>Capsicum frutescens</i>                         | India               | GU227877                | GU228269        | JX009999        | —               | GU227975        | GU228171        | —               |
|                                                    | CBS 345.70                | <i>Glycine max</i>                                 | Denmark             | GU227867                | GU228259        | JX010000        | —               | GU227965        | GU228161        | —               |
|                                                    | CBS195.32                 | <i>Glycine max</i>                                 | USA                 | GU227865                | GU228257        | JX010001        | —               | GU227963        | GU228159        | —               |
| <i>C. verruculosum</i>                             | IMI 45525                 | <i>Crotalaria juncea</i>                           | Zimbabwe            | GU227806                | GU228198        | <b>JX010002</b> | —               | GU227904        | GU228100        | —               |
| <i>C. viniferum</i>                                | <b>GZAAS 5.08601*</b>     | <i>Vitis vinifera</i> , cv. 'Shuijing'             | <b>China</b>        | <b>JN412804</b>         | <b>JN412798</b> | <b>JX010003</b> | —               | <b>JN412795</b> | <b>JN412813</b> | —               |
| <i>C. walleri</i>                                  | <b>CBS 125472*</b>        | <i>Coffea</i> sp., leaf tissue                     | <b>Vietnam</b>      | <b>JQ948275</b>         | <b>JQ948605</b> | <b>JX010004</b> | —               | <b>JQ949596</b> | <b>JQ949926</b> | —               |
| <i>C. wuxiense</i>                                 | <b>CGMCC 3.17894*</b>     | <i>Camellia sinensis</i>                           | <b>China</b>        | <b>KU251591</b>         | <b>KU252045</b> | <b>JX010005</b> | —               | <b>KU251672</b> | <b>KU252200</b> | —               |
| <i>C. xanthorrhoeae</i>                            | <b>BRIP 45094*</b>        | <i>Xanthorrhoea preissii</i>                       | <b>Australia</b>    | <b>JX010261</b>         | <b>JX009927</b> | <b>JX010006</b> | —               | <b>JX009478</b> | <b>JX010448</b> | —               |
| <i>C. yunajiangensis</i>                           | <b>GCMCC 3.18964</b>      | <i>Ageratina adenophora</i>                        | <b>China</b>        | <b>OK030885</b>         | <b>OK513686</b> | <b>OK513583</b> | —               | <b>OK513620</b> | <b>OK513649</b> | —               |
|                                                    | YMF1.04997                | <i>Ageratina adenophora</i>                        | China               | OK030886                | OK513687        | OK513584        | —               | OK513621        | OK513650        | —               |
| <i>C. yunnanense</i>                               | CBS 132135                | <i>Buxus</i> sp.                                   | China               | JX546804                | JX546706        | JX010007        | —               | JX519239        | JX519248        | —               |
| <i>C. yulongense</i>                               | <b>CFCC 50818*</b>        | <i>Vaccinium dunalianum</i> var. <i>urophyllum</i> | <b>China</b>        | <b>MH751507</b>         | <b>MK108986</b> | <b>MH793605</b> | —               | <b>MH777394</b> | <b>MK108987</b> | —               |
| <i>Colletotrichum</i> sp.                          | MAFF 238642               | <i>Dendrobium kingianum</i>                        | Japan               | JQ005163                | JQ005250        | JX010008        | JQ005424        | JQ005511        | JQ005597        | —               |
| <i>Glomerella cingulata</i>                        | ICMP 10643                | <i>Camellia</i> × <i>williamsii</i>                | UK                  | JX010224                | JX009908        | JX010009        | —               | JX009540        | JX010436        | —               |
| <i>Glomerella cingulata</i> var. <i>migrans</i>    | CBS 237.49                | <i>Hypericum perforatum</i>                        | Germany             | JX010238                | JX010042        | JX009910        | —               | JX009450        | JX010432        | —               |
| <i>Glomerella rufomaculans</i> var. <i>vaccini</i> | CBS 124.22                | <i>Vaccinium</i> sp.                               | USA                 | JX010228                | JX009950        | JX009911        | —               | JX009536        | JX010433        | —               |
| <i>Monilochaetes infuscans</i>                     | <b>CBS 869.96*</b>        | <i>Ipomoea batatas</i>                             | <b>South Africa</b> | <b>JQ005780</b>         | <b>JX546612</b> | <b>JX010010</b> | —               | <b>JQ005843</b> | <b>JQ005864</b> | —               |

1. ATCC: American Type Culture Collection, Virginia, USA; BCC: BIOTEC culture collection, Bangkok, Thailand; BRIP: Plant Pathology Herbarium, Department of Employment, Economic, Development and Innovation, Queensland, Australia; CBS: Culture collection of the Centraalbureau voor Schimmelcultures, Fungal Biodiversity Centre, Utrecht, The Netherlands; CGMCC: China General Microbiological Culture Collection Center, Beijing, China; CMM: Culture Collection of Phytopathogenic Fungi Prof. Maria Menezes, Federal Rural University of Pernambuco, Brazil; CPC: Culture collection of Pedro Crous, housed at CBS; COAD: Coleção Octávio Almeida Drummond, Viçosa, Brazil; GZAAS: Guizhou Academy of Agricultural Sciences, Guiyang, China; IMI: Culture collection of CABI Europe UK Centre, Egham, UK; MAFF: MAFF Genebank Project, Ministry of Agriculture, Forestry and Fisheries, Tsukuba, Japan; MFLUCC: Culture collection of the Mae Fah Luang University, Chiang Rai, Thailand ; SAUCC: Culture collection of the Department of Plant Pathology, College of Plant Protection, Shenyang Agricultural University, China;
2. ITS: internal transcribed spacers and intervening 5.8S nrDNA; GAPDH: partial glyceraldehyde-3-phosphate dehydrogenase gene; CHS-1: partial chitin synthase-1 gene; HIS: partial histone H3 gene; ACT: partial actin gene; TUB2: partial beta-tubulin gene; GS: intron 2 glutamine synthetase.

\* = ex-type or authentic culture, (\*) = ex-type or authentic culture of synonymised taxon. Strains studied in this paper are in bold font.
