# Supplementary material for: Colletotrichum Species Associated with Anthracnose Disease of Watermelon (Citrullus lanatus) in China
Source: J Fungi (Basel). 2022 Jul 28;8(8):790. doi: 10.3390/jof8080790 (PMC9410023; doi:10.3390/jof8080790)
Supplement: Supplementary file 1 [file jof-08-00790-s001.zip]

Archive with 4 entries (4 files):
- figure s1.pdf
- Table s1.pdf
- Table s2.pdf
- Table s3.pdf
